# Supplementary material
Source: PubMed Central journal article supplement (PMC3328182)
Supplement: supp_139.10.1863_DEV074005TableS2.pdf [file supp_139.10.1863_DEV074005TableS2.pdf]

**Table S2. Complete list and plots of predicted potential targets for selected transcription factors based upon synexpression according to Brunskill et al (2008).**

| <b>Tcfap2b or Tcfap2b 0.7 filtered</b> |                    |                |
|----------------------------------------|--------------------|----------------|
| <b>Potter 15 compartments March09</b>  |                    |                |
| <b>TissueID (*)</b>                    |                    |                |
| <b>Systematic</b>                      | <b>Common name</b> | <b>Genbank</b> |
| 1423340_at                             | Tcfap2b            | AV334599       |
| 1457215_at                             | OTTMUSG00000010446 | BB429361       |
| 1435670_at                             | Tcfap2b            | AV237028       |
| 1415857_at                             | Emb                | BG064842       |
| 1440870_at                             | Prdm16             | BB356786       |
| 1435678_at                             | 2610017109Rik      | AW045679       |
| 1451100_a_at                           | Cdv3               | AI845410       |
| 1428848_a_at                           | Macf1              | BM248206       |
| 1424351_at                             | Wfdc2              | AF334269       |
| 1429857_at                             | 2900092D14Rik      | BB807002       |
| 1427046_at                             | Grhl2              | BC004783       |
| 1426673_at                             | Cdh3               | X06340         |
| 1417379_at                             | Iqgap1             | NM_016721      |
| 1423746_at                             | Txndc5             | BC016252       |
| 1448690_at                             | Kcnk1              | NM_008430      |
| 1451780_at                             | Blnk               | AF068182       |
| 1455896_a_at                           | Kcnk1              | AU043100       |
| 1440745_at                             | Prdm16             | BB796293       |
| 1453304_s_at                           | Ly6e               | BM245572       |
| 1420736_at                             | Sim1               | NM_011376      |
| 1456446_at                             | 4930523C07Rik      | BM246687       |
| 1437865_at                             | Spata13            | AW546433       |
| 1449107_at                             | Nudt4              | NM_027722      |
| 1437936_at                             | 6330534C20Rik      | AI428240       |
| 1415856_at                             | Emb                | BG064842       |
| 1438567_at                             | Vwa2               | BB704902       |
| 1440000_at                             | E330013P04Rik      | BG069958       |
| 1450339_a_at                           | Bcl11b             | NM_021399      |
| 1448931_at                             | F2r1               | NM_007974      |
| 1435197_at                             | Pou3f3             | BE993443       |
| 1457867_at                             | Sgpp2              | BB360745       |
| 1417797_a_at                           | 1810019J16Rik      | NM_133707      |
| 1442350_at                             | ---                | AV233462       |
| 1417275_at                             | Mal                | NM_010762      |
| 1416579_a_at                           | Epcam              | BC005618       |
| 1448565_at                             | Ppp1r11            | NM_029632      |
| 1456675_at                             | Mpr1p              | BB279458       |
| 1429261_at                             | 2210411K11Rik      | AW045964       |
| 1449967_at                             | Sim1               | NM_011376      |

|              |                                                                                                                                                                    |           |
|--------------|--------------------------------------------------------------------------------------------------------------------------------------------------------------------|-----------|
| 1448702_at   | Hdhd2 /// Ier3ip1                                                                                                                                                  | BE287896  |
| 1455258_at   | Kcnc2                                                                                                                                                              | BQ174236  |
| 1453614_a_at | Nfe2l3                                                                                                                                                             | AK017278  |
| 1429175_at   | Tmem178                                                                                                                                                            | AK014196  |
| 1415897_a_at | Mgst1                                                                                                                                                              | BI150149  |
| 1431035_at   | Daam1                                                                                                                                                              | AW988556  |
| 1444451_at   | Pappa2                                                                                                                                                             | BB101283  |
| 1416211_a_at | Ptn                                                                                                                                                                | BC002064  |
| 1418449_at   | Lad1                                                                                                                                                               | NM_133664 |
| 1434851_s_at | Crb3                                                                                                                                                               | AU015319  |
| 1428634_at   | Twistnb                                                                                                                                                            | AK016638  |
| 1454681_at   | Rbm35a                                                                                                                                                             | BG070112  |
| 1435367_at   | Mapk4                                                                                                                                                              | BQ177154  |
| 1448393_at   | Cldn7                                                                                                                                                              | BC008104  |
| 1424649_a_at | Tspan8                                                                                                                                                             | BC025461  |
| 1448261_at   | Cdh1                                                                                                                                                               | NM_009864 |
| 1418076_at   | St14                                                                                                                                                               | NM_011176 |
| 1452493_s_at | Hoxb7 /// Hoxb8                                                                                                                                                    | X13721    |
| 1421907_at   | Med1                                                                                                                                                               | BB760479  |
| 1443535_at   | Rabgap1                                                                                                                                                            | BM223600  |
| 1460314_s_at | Hist1h3a /// Hist1h3b /// Hist1h3c ///<br>Hist1h3d /// Hist1h3e /// Hist1h3f ///<br>Hist1h3g /// Hist1h3h /// Hist1h3i ///<br>Hist2h3b /// Hist2h3c1 /// Hist2h3c2 | NM_019469 |
| 1416501_at   | Pdpk1                                                                                                                                                              | NM_011062 |
| 1423260_at   | Id4 /// LOC100045546                                                                                                                                               | BB121406  |
| 1420935_a_at | Srrm1                                                                                                                                                              | NM_016799 |
| 1447615_at   | ---                                                                                                                                                                | BM249512  |
| 1424404_at   | 0610040J01Rik                                                                                                                                                      | BC004797  |
| 1451348_at   | Depdc6                                                                                                                                                             | BC004774  |
| 1443509_at   | ---                                                                                                                                                                | AU042807  |
| 1429154_at   | LOC100048307 /// Slc35f2                                                                                                                                           | BG069340  |
| 1459661_at   | Dcdc2a                                                                                                                                                             | AW492955  |
| 1419294_at   | 1700011H14Rik                                                                                                                                                      | NM_025956 |
| 1441213_at   | BC021891                                                                                                                                                           | AV370141  |
| 1416490_at   | LOC100047810 /// Tmed6                                                                                                                                             | NM_025458 |
| 1441484_at   | ---                                                                                                                                                                | AV352256  |

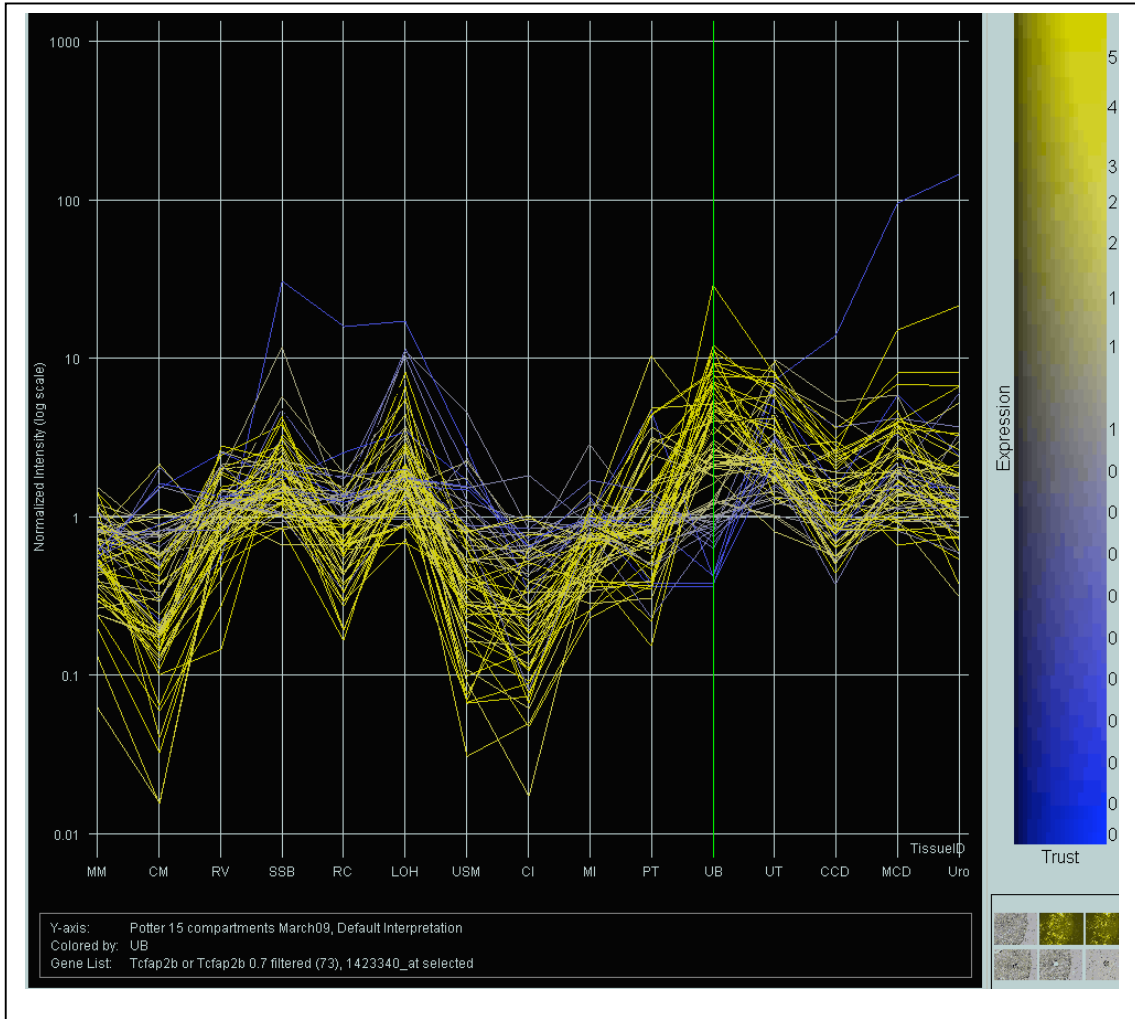

| <b>Sox8 0.8 filtered 3 or Sox8 2</b>  |                     |                        |
|---------------------------------------|---------------------|------------------------|
| <b>Potter 15 compartments March09</b> |                     |                        |
| <b>TissueID (*)</b>                   |                     |                        |
| <b>Systematic</b>                     | <b>Common name</b>  | <b>Genbank</b>         |
| 1418476_at                            | Crf1                | NM_018827              |
| 1420955_at                            | Vsnl1               | NM_012038              |
| 1440849_at                            | ---                 | AV327187               |
| 1418688_at                            | Calcr               | NM_007588              |
| 1424152_at                            | Sall4               | BG064756               |
| 1417171_at                            | ltk                 | NM_010583              |
| 1432463_at                            | 5730510P18Rik       | AK017761               |
| 1435832_at                            | Lrrc4               | BB332932               |
| 1452825_at                            | Tmem59l             | AK005155               |
| 1427484_at                            | Eml5                | BB650819               |
| 1455947_at                            | Mar-11              | BB667208               |
| 1435980_x_at                          | Wnt6                | AV308073               |
| 1449205_at                            | Ovol2               | NM_026924              |
| 1440000_at                            | E330013P04Rik       | BG069958               |
| 1429269_at                            | BC068157            | BE992549               |
| 1417960_at                            | Cpeb1               | NM_007755              |
| 1435956_at                            | Frmd5               | BB277380               |
| 1442301_at                            | AW060742            | AW046255               |
| 1419708_at                            | Wnt6                | NM_009526              |
| 1455085_at                            | 1700086L19Rik       | BI526033               |
| 1425970_a_at                          | Ros1                | U15443                 |
| 1435204_at                            | Prmt8               | BG065273               |
| 1436243_at                            | Frmd5               | AW046024               |
| 1440270_at                            | Fgf12               | BQ175704               |
| 1427975_at                            | Rasl10a             | AK008807               |
| 1433471_at                            | Tcf7                | AI323642               |
| 1435285_at                            | Mpped2              | BB731805               |
| 1435438_at                            | Sox8                | AV345303               |
| 1454788_at                            | Arl4c /// LOC632433 | BQ176306               |
| 1452980_at                            | 2810468N07Rik       | AK013390               |
| 1449264_at                            | Syt11               | BC025207               |
| 1459682_at                            | EG434249            | AW060884               |
| 1428223_at                            | Mfsd2               | AK006096               |
| 1451693_a_at                          | Fgf12               | AF020738               |
| 1426332_a_at                          | Cldn3               | AF087821               |
| 1458245_at                            | OTTMUSG00000007332  | BM198146               |
| AFFX-GapdhMur/M32599_5_at             | Gapdh               | AFFX-GapdhMur/M32599_5 |
| 1458693_at                            | ---                 | BB461850               |
| 1437263_at                            | A730089K16Rik       | BB138441               |
| 1425886_at                            | Fev                 | AY049085               |
| 1450484_a_at                          | Cmpk2               | AK004595               |
| 1428837_at                            | Kihl14              | AK018108               |
| 1437744_at                            | Slitrk4             | BB357579               |

|              |                        |           |
|--------------|------------------------|-----------|
| 1428347_at   | Cyfp2                  | AK005148  |
| 1455176_a_at | Syt11                  | BF457392  |
| 1438512_at   | BC048679               | AV360837  |
| 1441742_at   | Kcnh5                  | AW048994  |
| 1415936_at   | Bcar3                  | NM_013867 |
| 1442039_at   | Tox                    | BF020502  |
| 1429651_at   | Phactr3                | AV339670  |
| 1422165_at   | Pou3f4                 | X66603    |
| 1421359_at   | Ret                    | NM_009050 |
| 1440759_at   | ENSMUSG00000074335     | BB321369  |
| 1426600_at   | Slc2a1                 | BM209618  |
| 1439904_at   | Fstl5                  | BB374771  |
| 1426673_at   | Cdh3                   | X06340    |
| 1445186_at   | Stc2                   | BB774473  |
| 1421017_at   | Nrg3                   | NM_008734 |
| 1421943_at   | Tgfa                   | M92420    |
| 1440371_at   | ---                    | BQ176223  |
| 1452284_at   | Ptprz1                 | BC002298  |
| 1430490_at   | ---                    | AK017409  |
| 1434553_at   | Tmem56                 | BB667728  |
| 1451046_at   | LOC100047651 /// Zfpm1 | AA014267  |
| 1421180_at   | Lix1                   | NM_025681 |
| 1442218_at   | Map3k9                 | BM201230  |
| 1435756_at   | Samd10                 | BB526577  |
| 1418966_a_at | Dcbl1                  | AK014521  |
| 1427300_at   | Lhx8                   | D49658    |
| 1424525_at   | Grp                    | BC024515  |
| 1453201_at   | Rassf10                | BB832200  |
| 1436563_at   | 4932441J04Rik          | AV277283  |
| 1426599_a_at | Slc2a1                 | BM209618  |
| 1434526_at   | Abhd7 /// LOC100046112 | BB175669  |
| 1424822_at   | Slain1                 | BB704967  |
| 1435852_at   | Spred3                 | BB459220  |
| 1419326_at   | 1700028P14Rik          | NM_026188 |
| 1428638_at   | Efhc2                  | BE956904  |
| 1455015_at   | Tbc1d9                 | BE853276  |
| 1420984_at   | Pctp                   | AF114437  |
| 1435188_at   | Gm129                  | BB407125  |
| 1453142_at   | 4921507P07Rik          | AV281687  |
| 1446196_at   | Hmga2                  | BB105328  |
| 1457894_at   | ---                    | BB284616  |
| 1434201_at   | Chrd1                  | AV144145  |
| 1436137_at   | Slc6a17                | AV340147  |
| 1455266_at   | Kif5c                  | BB698320  |
| 1418457_at   | Cxcl14                 | AF252873  |
| 1439768_x_at | Sema4f                 | BB271145  |
| 1449390_at   | Gpatch4                | NM_025663 |
| 1444330_at   | D2Ert173e              | BG066195  |

|              |               |           |
|--------------|---------------|-----------|
| 1443979_at   | A830021K08Rik | AI851680  |
| 1453753_at   | Dtl           | AK012919  |
| 1459381_at   | ---           | BM119377  |
| 1457140_s_at | Rassf10       | BB003906  |
| 1418203_at   | Pmaip1        | NM_021451 |
| 1460258_at   | Lect1         | NM_010701 |

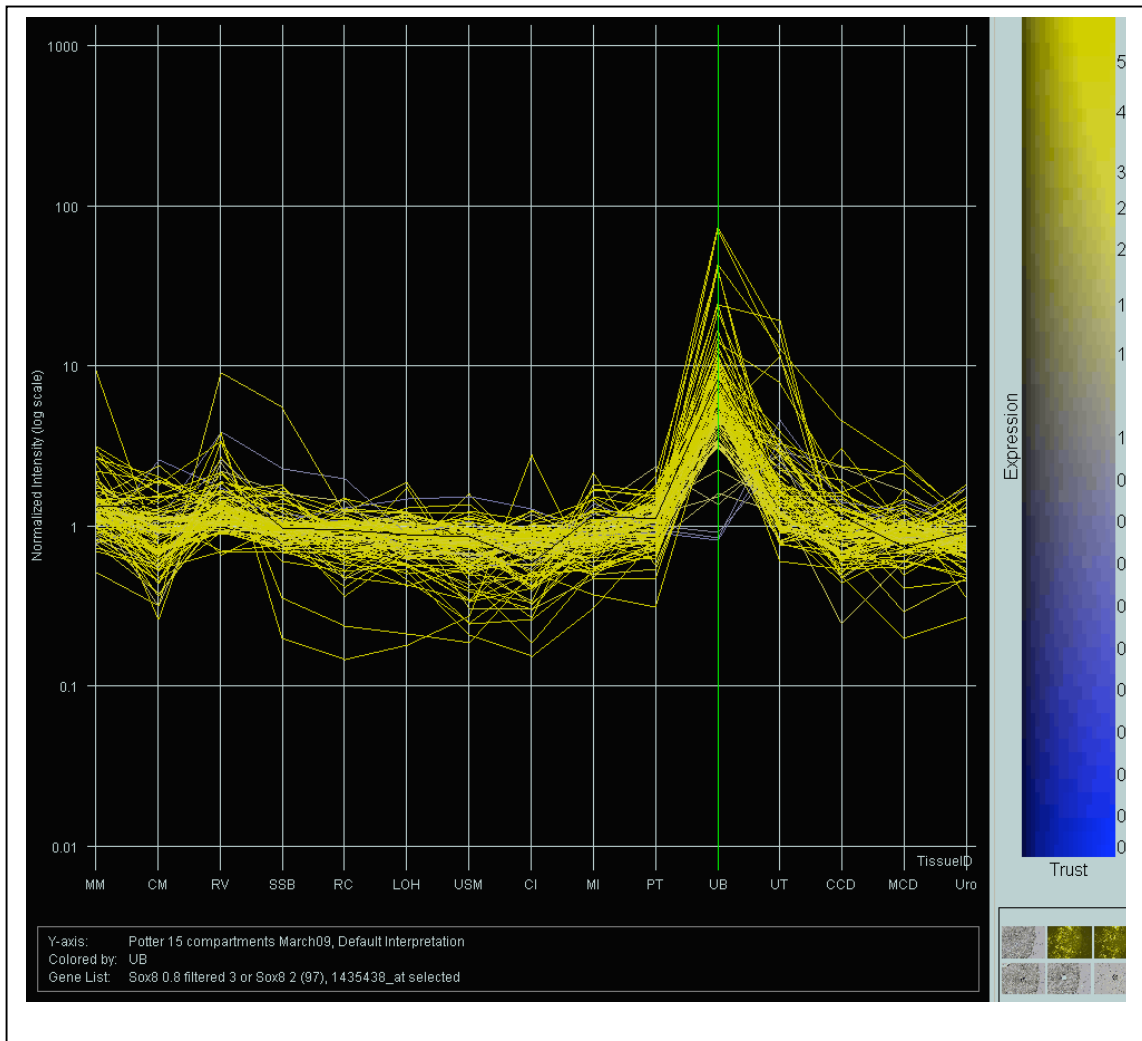

| <b>Pou3f1 by Prox and early tubule final</b> |                          |                |
|----------------------------------------------|--------------------------|----------------|
| <b>Potter 15 compartments March09</b>        |                          |                |
| <b>TissueID (*)</b>                          |                          |                |
| <b>Systematic</b>                            | <b>Common name</b>       | <b>Genbank</b> |
| 1448249_at                                   | Gpd1                     | BC019391       |
| 1418176_at                                   | Vdr                      | AV290079       |
| 1447800_x_at                                 | Tcn2                     | AV085634       |
| 1426102_at                                   | Cyp2j13                  | BC016446       |
| 1455025_at                                   | Paqr9                    | AV103696       |
| 1424959_at                                   | Anxa13                   | BC013521       |
| 1448299_at                                   | Slc1a1                   | NM_009199      |
| 1452986_at                                   | Hgd                      | AK002584       |
| 1458948_at                                   | D630013N20Rik            | BB798482       |
| 1423400_at                                   | Kl                       | BQ175355       |
| 1459973_x_at                                 | Dpp4                     | BB228059       |
| 1424726_at                                   | Tmem150                  | BC014685       |
| 1429950_at                                   | Unc5cl                   | AK010945       |
| 1438707_at                                   | Atp13a4 /// LOC637970    | BE687891       |
| 1449374_at                                   | Pipox                    | BC013525       |
| 1416025_at                                   | Fgg                      | NM_133862      |
| 1425596_at                                   | Al317395                 | BC018406       |
| 1455593_at                                   | Apob                     | Al785548       |
| 1456076_at                                   | Defb19                   | AV209128       |
| 1419129_at                                   | Slc22a13                 | NM_133980      |
| 1418993_s_at                                 | F10                      | NM_007972      |
| 1441342_at                                   | Dpp4                     | BQ030854       |
| 1438183_x_at                                 | Sord                     | AV253518       |
| 1424393_s_at                                 | Adhfe1                   | BC026584       |
| 1420388_at                                   | Prss12                   | NM_008939      |
| 1416051_at                                   | C2                       | NM_013484      |
| 1418138_at                                   | Sult1d1                  | NM_016771      |
| 1425318_a_at                                 | Tmem116                  | BC019151       |
| 1417686_at                                   | Lgals12                  | AF244979       |
| 1449163_at                                   | Sigirr                   | NM_023059      |
| 1454268_a_at                                 | Cyba                     | AK018713       |
| 1424529_s_at                                 | Cgref1                   | BC023116       |
| 1441850_x_at                                 | Tcn2                     | BB449960       |
| 1452311_at                                   | Dmgdh                    | AK004755       |
| 1431795_a_at                                 | Sema3b                   | AK014333       |
| 1427215_at                                   | ---                      | BC021774       |
| 1436474_at                                   | Mrcl                     | BB014828       |
| 1449556_at                                   | C920025E04Rik /// H2-T23 | NM_010398      |
| 1452592_at                                   | Mgst2                    | AV066880       |
| 1427203_at                                   | Myo15b                   | BF581819       |
| 1445242_at                                   | Gyk                      | BQ176629       |
| 1439494_at                                   | Slc5a9                   | BB003029       |

|              |                            |           |
|--------------|----------------------------|-----------|
| 1447112_s_at | Cry11                      | C85932    |
| 1428752_at   | Slc5a11                    | AK008219  |
| 1438332_at   | Slc22a6                    | BB127498  |
| 1434742_s_at | Aifm3                      | BF320633  |
| 1416649_at   | Ambp                       | NM_007443 |
| 1426584_a_at | Sord                       | BI143942  |
| 1436504_x_at | Apoa4                      | AV027367  |
| 1416383_a_at | Pcx                        | NM_008797 |
| 1456174_x_at | Ndrp1                      | AV309418  |
| 1420553_x_at | Serpina1a                  | NM_009243 |
| 1425415_a_at | Slc1a1                     | U75214    |
| 1451796_s_at | Hdc                        | AF109137  |
| 1415969_s_at | Kap                        | NM_010594 |
| 1427214_at   | Agmat                      | AK017155  |
| 1454854_at   | Ostb                       | AV000952  |
| 1417382_at   | Entpd5                     | NM_007647 |
| 1432099_a_at | Prodh2                     | AK011039  |
| 1427000_at   | Hnf4a                      | BF580781  |
| 1440211_at   | Cyp2j11                    | AI790773  |
| 1426706_s_at | Xylb                       | BB431728  |
| 1424995_at   | Glyctk                     | BB408396  |
| 1450109_s_at | Abcc2                      | NM_013806 |
| 1455005_s_at | Slc5a2                     | AW107751  |
| 1451760_s_at | 2010001E11Rik /// AI317395 | BC018406  |
| 1428079_at   | Fgb                        | AK011118  |
| 1427034_at   | Ace                        | AW208573  |
| 1435838_at   | Agxt2                      | BB709256  |
| 1417498_at   | Serpinf2                   | NM_008878 |
| 1448813_at   | Aadac                      | NM_023383 |
| 1424758_s_at | Serpina10                  | BC018416  |
| 1448485_at   | Ggt1                       | NM_008116 |
| 1418013_at   | Cml1                       | NM_023160 |
| 1451879_a_at | Slc6a18                    | AF075266  |
| 1417072_at   | Slc22a6                    | NM_008766 |
| 1421195_at   | Cckar                      | BC020534  |
| 1422899_at   | Slc6a20b                   | BC013484  |
| 1426147_s_at | Cldn10                     | BC021770  |
| 1438377_x_at | Slc13a3                    | BB497312  |
| 1426511_at   | Susd2                      | AK004703  |
| 1417531_at   | Cyp2j5                     | BF783609  |
| 1448783_at   | Slc7a9                     | NM_021291 |
| 1454638_a_at | Pah                        | AW106920  |
| 1428975_at   | Susd3                      | AK003860  |
| 1419622_at   | Ugt2b5                     | NM_009467 |
| 1448741_at   | Slc3a1                     | NM_009205 |
| 1419117_at   | Slc22a2                    | NM_013667 |
| 1440218_at   | Pcdh24                     | BB745015  |
| 1417280_at   | Slc17a1                    | NM_009198 |



|              |                     |           |
|--------------|---------------------|-----------|
| 1448683_at   | Cyp2d26             | NM_029562 |
| 1419095_a_at | Apom                | NM_018816 |
| 1448470_at   | Fbp1                | NM_019395 |
| 1418923_at   | Slc17a3             | NM_134069 |
| 1448837_at   | Vil1                | NM_009509 |
| 1417785_at   | Pla1a               | NM_134102 |
| 1423590_at   | Napsa               | AW105774  |
| 1419057_at   | Slc5a1              | AF208031  |
| 1423279_at   | Slc34a1             | AI788646  |
| 1418804_at   | Sucnr1              | NM_032400 |
| 1418696_at   | Ttc36               | NM_138951 |
| 1449890_at   | Ugt2b37             | NM_053215 |
| 1451681_at   | BC089597            | BC018263  |
| 1435354_at   | Kcnj15              | BB533892  |
| 1429523_a_at | Slc39a5             | AK008448  |
| 1416980_at   | Mettl7b             | NM_027853 |
| 1417745_at   | Cpn1                | NM_030703 |
| 1434906_at   | 0610005C13Rik       | AI182092  |
| 1418668_at   | Acsm1               | NM_054094 |
| 1424338_at   | Slc6a13             | BC023117  |
| 1423397_at   | Ugt2b38             | AI118428  |
| 1448949_at   | Car4                | NM_007607 |
| 1419579_at   | Slc7a12             | NM_080852 |
| 1457825_x_at | Tcn2                | BB515151  |
| 1457664_x_at | C2                  | AV227574  |
| 1436168_at   | C730029A08Rik       | BB428892  |
| 1448200_at   | Tcn2                | NM_015749 |
| 1440957_at   | Defb29              | BB847171  |
| 1427223_a_at | Acsm2               | AI987711  |
| 1427627_at   | ENSMUSG00000074889  | BC019455  |
| 1441723_at   | ---                 | AI131729  |
| 1419096_at   | Apom                | NM_018816 |
| 1436644_x_at | Tmem25              | BB245618  |
| 1424853_s_at | Cyp4a10 /// Cyp4a31 | BC010747  |
| 1418118_at   | Slc22a1             | NM_009202 |
| 1451588_at   | 1810022C23Rik       | BC014724  |
| 1422898_s_at | Slc22a12            | NM_009203 |
| 1426309_at   | Asb9                | AF398970  |
| 1418976_s_at | Cideb               | NM_009894 |
| 1426595_at   | Slc18a1             | BB011871  |
| 1418094_s_at | Car4                | NM_007607 |
| 1449330_at   | Pdzd3               | NM_133226 |
| 1422557_s_at | Mt1                 | NM_013602 |
| 1424451_at   | Acaa1a /// Acaa1b   | BC019882  |
| 1421912_at   | Slc23a1             | AA276202  |
| 1455431_at   | Slc5a1              | AV371434  |

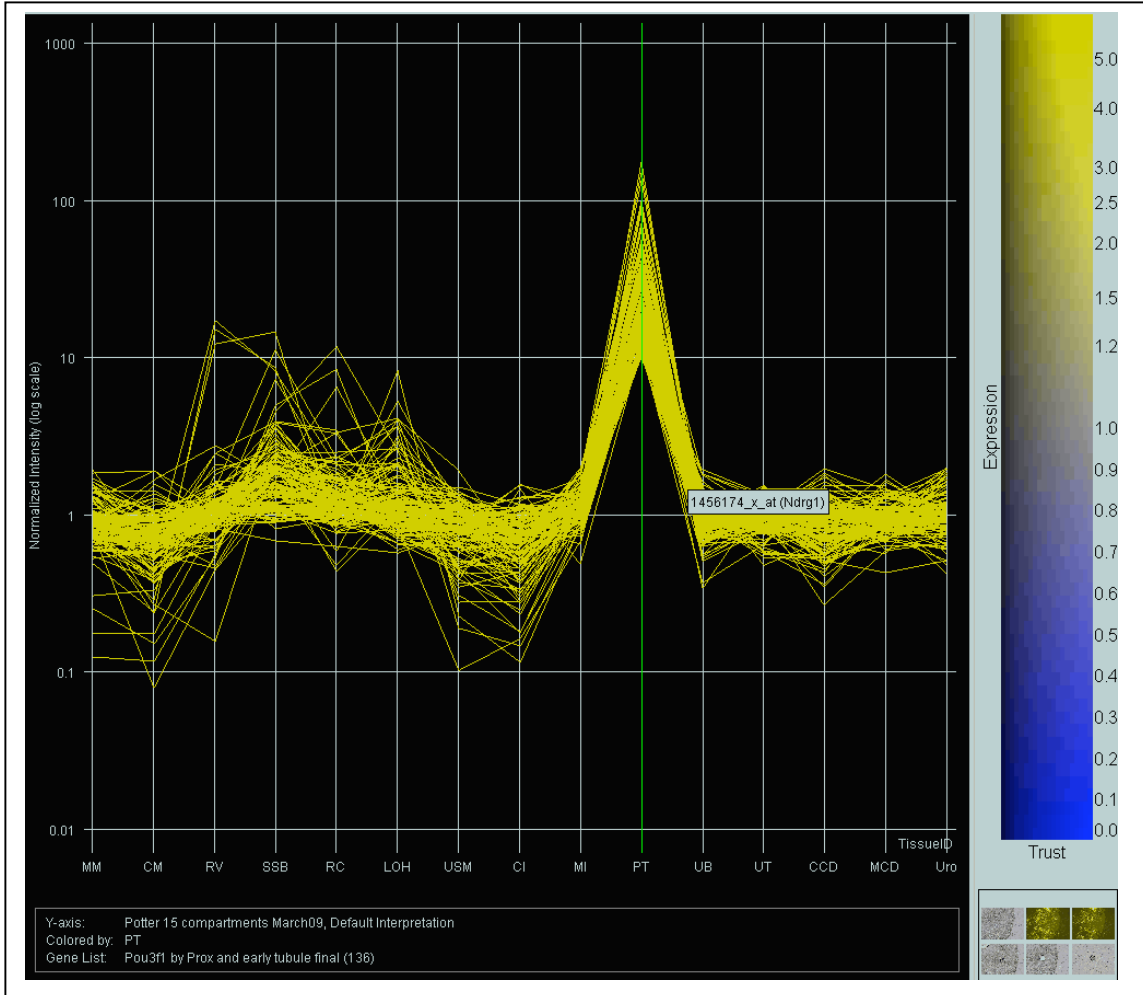

| <b>lrx1 0.8 filtered or lrx1</b>      |                    |                |
|---------------------------------------|--------------------|----------------|
| <b>Potter 15 compartments March09</b> |                    |                |
| <b>TissueID (*)</b>                   |                    |                |
| <b>Systematic</b>                     | <b>Common name</b> | <b>Genbank</b> |
| 1451194_at                            | Aldob              | BC024112       |
| 1418395_at                            | Slc47a1            | NM_026183      |
| 1418453_a_at                          | Atp1b1             | NM_009721      |
| 1417231_at                            | Cldn2              | NM_016675      |
| 1435354_at                            | Kcnj15             | BB533892       |
| 1441342_at                            | Dpp4               | BQ030854       |
| 1418696_at                            | Ttc36              | NM_138951      |
| 1435064_a_at                          | Tmem27             | AI314694       |
| 1429071_at                            | Me3                | AK006146       |
| 1415938_at                            | Spink3             | NM_009258      |
| 1426147_s_at                          | Cldn10             | BC021770       |
| 1456601_x_at                          | Fxyd2              | AV002675       |
| 1418771_a_at                          | Cpb2               | NM_019775      |
| 1427001_s_at                          | Hnf4a              | BF580781       |
| 1451983_at                            | lrx1               | AF165984       |
| 1424959_at                            | Anxa13             | BC013521       |
| 1448485_at                            | Ggt1               | NM_008116      |
| 1419378_a_at                          | Fxyd2              | NM_052823      |
| 1456190_a_at                          | Acsm2              | BB745805       |
| 1460250_at                            | Sostdc1            | BC021458       |
| 1423400_at                            | Kl                 | BQ175355       |
| 1419379_x_at                          | Fxyd2              | NM_052823      |
| 1417920_at                            | Amn                | NM_033603      |
| 1426594_at                            | Frmd4b             | BG067753       |
| 1425108_a_at                          | BC004728           | BC004728       |
| 1439794_at                            | ---                | BQ086474       |
| 1436233_at                            | AI117581           | BM123923       |
| 1454336_at                            | ---                | AK013273       |
| 1453750_x_at                          | Pitpnc1            | BI654600       |
| 1450583_s_at                          | Fpr3               | NM_008038      |
| 1426348_at                            | Col4a1             | BF158638       |
| 1438928_x_at                          | Ninj1              | BB252065       |
| 1456873_at                            | Clic5              | BB236747       |
| 1419589_at                            | Cd93               | BB039247       |
| 1433720_s_at                          | Chchd10            | AI647775       |
| 1424375_s_at                          | Gimap4             | BC005577       |
| 1420589_at                            | Has3               | NM_008217      |
| 1416697_at                            | Dpp4               | NM_010074      |
| 1450414_at                            | Pdgfb              | BC023427       |
| 1457785_at                            | ---                | BE627957       |
| 1453042_at                            | Anks4b             | AK008229       |
| 1459973_x_at                          | Dpp4               | BB228059       |
| 1429116_at                            | Slc17a5            | BB009879       |

|              |                 |           |
|--------------|-----------------|-----------|
| 1436660_at   | Rrbp1           | BB667837  |
| 1429175_at   | Tmem178         | AK014196  |
| 1448806_at   | Mmp24           | AB021226  |
| 1434774_at   | Rhbdf2          | BB005249  |
| 1430599_at   | Myt1l           | BB130512  |
| 1448688_at   | Podxl           | AF290209  |
| 1454494_at   | 5830448L01Rik   | AK017998  |
| 1433891_at   | Lgr4            | BI107632  |
| 1416001_a_at | Cotl1           | NM_028071 |
| 1448577_x_at | Syngn2          | BC004829  |
| 1452035_at   | Col4a1          | BF158638  |
| 1419167_at   | Prap1           | NM_009475 |
| 1426778_at   | Dag1            | BG094386  |
| 1422444_at   | Itga6           | BM935811  |
| 1456768_a_at | Mmrn2           | AV319507  |
| 1426528_at   | Nrp2 /// Pard3b | BQ176723  |
| 1417023_a_at | Fabp4           | NM_024406 |
| 1453188_at   | 6230424C14Rik   | AI553459  |
| 1454268_a_at | Cyba            | AK018713  |
| 1424374_at   | Gimap4          | BC005577  |
| 1424683_at   | Fam134b         | BC019494  |
| 1449163_at   | Sigirr          | NM_023059 |
| 1444963_at   | ---             | AW548231  |
| 1450505_a_at | Fam134b         | NM_025459 |
| 1441810_at   | ---             | BM877939  |
| 1450543_at   | Myo1h           | NM_026145 |
| 1441901_x_at | Fahd2a          | AV066322  |
| 1426784_at   | Trim47          | AV077293  |
| 1452939_a_at | Pitpnc1         | AI595920  |
| 1422445_at   | Itga6           | BM935811  |
| 1448631_a_at | Hipk2           | NM_010433 |
| 1443698_at   | Xaf1            | BB645745  |
| 1449135_at   | Sox18           | NM_009236 |
| 1459206_at   | ---             | BG076344  |
| 1417271_a_at | Eng             | NM_007932 |
| 1457741_at   | ---             | AV377040  |
| 1436990_s_at | Chchd10         | AA038464  |
| 1456833_at   | Gpr17           | BB353220  |
| 1431498_at   | 9530097N15Rik   | BB124449  |
| 1451891_a_at | Dysf            | AF188290  |
| 1454458_at   | 6230426I18Rik   | AK018099  |

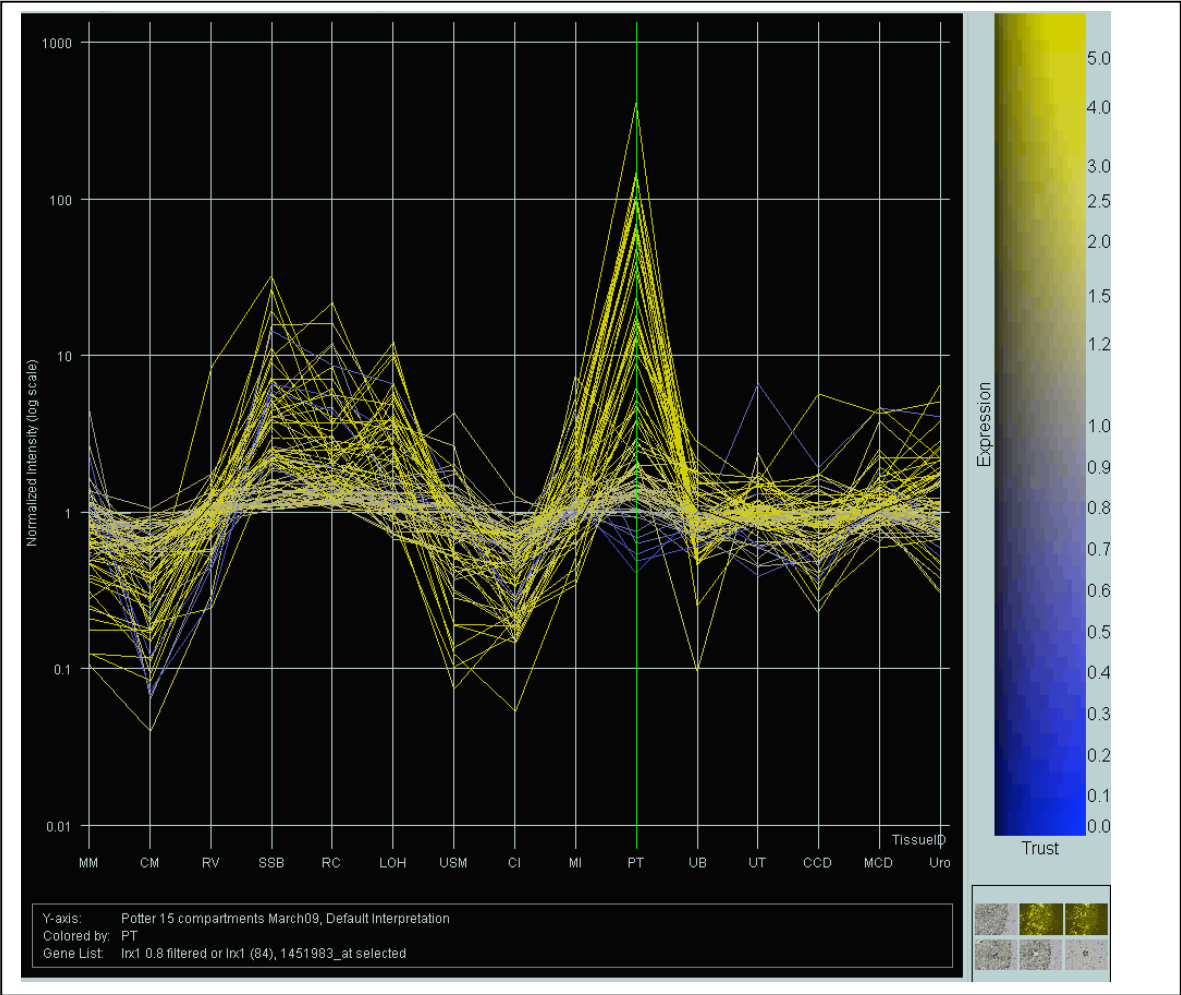

| <b>Foxi1 2 or Foxi1 0.8 filtered</b>  |                               |                |
|---------------------------------------|-------------------------------|----------------|
| <b>Potter 15 compartments March09</b> |                               |                |
| <b>TissueID (*)</b>                   |                               |                |
| <b>Systematic</b>                     | <b>Common name</b>            | <b>Genbank</b> |
| 1458401_at                            | 4932438A13Rik                 | BB203808       |
| 1433579_at                            | Tmem30b                       | BG068678       |
| 1427629_at                            | OTTMUSG00000014243 /// Ptprij | D83204         |
| 1435741_at                            | Pde8b                         | BB312125       |
| 1449199_at                            | Muc1                          | NM_013605      |
| 1433727_at                            | Glb1l2                        | AV367395       |
| 1443882_at                            | ---                           | BI150812       |
| 1437664_at                            | Hoxd3                         | BB195802       |
| 1448767_s_at                          | Gjb1                          | BC026833       |
| 1442708_at                            | ---                           | BB504418       |
| 1436335_at                            | Plch2                         | BI732150       |
| 1419079_at                            | Scnn1g                        | NM_011326      |
| 1431248_at                            | 5031426D15Rik                 | BB637274       |
| 1456242_at                            | EG653016                      | AV101904       |
| 1448950_at                            | Il1r1                         | NM_008362      |
| 1449357_at                            | 2310030G06Rik                 | NM_025865      |
| 1455396_at                            | Atp8b1                        | BF451402       |
| 1427183_at                            | Efemp1                        | BC023060       |
| 1420683_at                            | Bnpl                          | NM_134253      |
| 1457843_at                            | Lypd6                         | AI848492       |
| 1417695_a_at                          | Soat1                         | BG064396       |
| 1439492_at                            | Sptlc3                        | BB370513       |
| 1453345_at                            | Npal1                         | AK014427       |
| 1434628_a_at                          | Rhpn2                         | BF228009       |
| 1424474_a_at                          | Camkk2                        | BI157430       |
| 1427677_a_at                          | Sox6                          | AJ010605       |
| 1426566_s_at                          | Il17re                        | BG973910       |
| 1449091_at                            | Cldn8                         | BC003868       |
| 1423414_at                            | Ptgs1                         | BB520073       |
| 1435999_at                            | Spink8                        | BB284475       |
| 1417362_at                            | Rhcg                          | NM_019799      |
| 1460732_a_at                          | Ppl                           | AF126834       |
| 1426540_at                            | Endod1                        | BF168366       |
| 1456563_at                            | 4933429F08Rik                 | BB769119       |
| 1436869_at                            | Shh                           | AV304616       |
| 1457531_a_at                          | A930017K11Rik                 | BB279411       |
| 1426542_at                            | Endod1                        | BF168366       |
| 1425382_a_at                          | Aqp4                          | U48399         |
| 1451786_at                            | Muc20                         | BC026367       |
| 1449458_at                            | Foxi1                         | BC007475       |
| 1449833_at                            | Sprr2f                        | NM_011472      |
| 1418207_at                            | Fxyd4                         | NM_033648      |
| 1434449_at                            | Aqp4                          | BB193413       |

|              |               |           |
|--------------|---------------|-----------|
| 1456138_at   | Lypd6         | BB541620  |
| 1458842_at   | Odz1          | AV340888  |
| 1424357_at   | Tmem45b       | BC026654  |
| 1433728_at   | Glb1l2        | AV367395  |
| 1423323_at   | Tacstd2       | AV241768  |
| 1419555_at   | Elf5          | BC012424  |
| 1424794_at   | Rnf186        | BC011492  |
| 1432655_at   | 3222402N08Rik | AK014321  |
| 1458213_at   | ---           | BB432268  |
| 1421156_a_at | Dsc2          | NM_013505 |
| 1423436_at   | Gsta3         | AI172943  |
| 1450277_at   | Avpr2         | NM_019404 |
| 1438558_x_at | Foxq1         | AV009267  |
| 1426911_at   | Dsc2          | BC004663  |
| 1418475_at   | Scnn1b        | NM_011325 |
| 1433691_at   | Ppp1r3c       | BQ176864  |
| 1453907_at   | C030041B07Rik | AK021138  |
| 1419475_a_at | Ehf           | BC008249  |
| 1444262_at   | 1110017F19Rik | AI506151  |
| 1424580_at   | Slc35a3       | AW822833  |
| 1416905_at   | Guca2a        | NM_008190 |
| 1457374_at   | Nedd4l        | AV377264  |
| 1437675_at   | Slc8a1        | BB522674  |
| 1422735_at   | Foxq1         | NM_008239 |
| 1440139_at   | ---           | BB729836  |
| 1437883_s_at | ---           | AV305314  |
| 1441214_at   | Exph5         | BQ176550  |
| 1441535_at   | Mllt3         | AV381294  |
| 1459322_at   | ---           | BB104577  |
| 1447231_at   | ---           | BM123508  |
| 1429946_at   | 2610301F02Rik | AK011952  |
| 1446598_at   | ---           | BB162460  |
| 1443216_at   | ---           | AV369290  |
| 1444985_at   | ---           | BG069063  |
| 1445454_at   | D2Ert282e     | BG066542  |
| 1419591_at   | Gsdmc1        | NM_031378 |
| 1442366_at   | ---           | BB216686  |
