# Supplementary material
Source: PubMed Central journal article supplement (PMC3328182)
Supplement: supp_139.10.1863_DEV074005TableS4.pdf [file supp_139.10.1863_DEV074005TableS4.pdf]

**Table S4. Most statistically robust transcription factor binding sites identified in potential target genes for each of the TFs examined (Pou3f1, Irx1, Tcfap2b, Sox8, and Foxi1).** For each TF, the table contains those TF binding sites within the promoter of each target gene identified as statistically significant using Monkey motif ( $p < 0.05$ , upper bound on false discovery rate  $< 0.1$ ) in both sets of orthologs. Sites presented represent those predicted in the ortholog comparisons that included rat, human and zebrafish. In all cases, the sequence presented is that present in the mouse genome. For each site, columns contain the genomic location in UCSC genome browser coordinates (Mouse July 2007 NCBI37/mm9 Assembly), the sequence matched against the motif at that location and its reverse complement.

| TF: Pou3f1 |                                                                                                                                                                                                                                                                                                                                                                                                                                                                                                           |                                                                                                                                                                                                                                                                                                                                                                        |                                                                                                                                                                                                                                                                                                                                                                             |
|------------|-----------------------------------------------------------------------------------------------------------------------------------------------------------------------------------------------------------------------------------------------------------------------------------------------------------------------------------------------------------------------------------------------------------------------------------------------------------------------------------------------------------|------------------------------------------------------------------------------------------------------------------------------------------------------------------------------------------------------------------------------------------------------------------------------------------------------------------------------------------------------------------------|-----------------------------------------------------------------------------------------------------------------------------------------------------------------------------------------------------------------------------------------------------------------------------------------------------------------------------------------------------------------------------|
| Target     | Genomic location                                                                                                                                                                                                                                                                                                                                                                                                                                                                                          | Site                                                                                                                                                                                                                                                                                                                                                                   | Reverse complement                                                                                                                                                                                                                                                                                                                                                          |
| Anxa13     | chr15:58221683-58221699<br>chr15:58220888-58220904<br>chr15:58220887-58220903<br>chr15:58220886-58220902                                                                                                                                                                                                                                                                                                                                                                                                  | ATAGCATTAAACCAAGCA<br>GTTTAATAAGTAACTTT<br>CGTTTAATAAGTAACTT<br>GCGTTTAATAAGTAACT                                                                                                                                                                                                                                                                                      | TGCTTGGTTAATGCTAT<br>AAAGTTACTTATTA AAC<br>AAGTTACTTATTAACG<br>AGTTACTTATTAACGC                                                                                                                                                                                                                                                                                             |
| Asb9       | chrX:160935345-160935361<br>chrX:160935346-160935362<br>chrX:160935349-160935365<br>chrX:160935350-160935366<br>chrX:160935365-160935381<br>chrX:160935366-160935382<br>chrX:160935369-160935385<br>chrX:160935370-160935386<br>chrX:160935864-160935880<br>chrX:160935865-160935881<br>chrX:160935868-160935884<br>chrX:160935872-160935888<br>chrX:160935873-160935889                                                                                                                                  | GTTTGAAGTAATTATTT<br>TTTGAAGTAATTATTTG<br>GAAGTAATTATTTGTAG<br>AAGTAATTATTTGTAGT<br>GTCTAAATGAATTAAGT<br>TCTAAATGAATTAAGTC<br>AAATGAATTAAGTCCAT<br>AATGAATTAAGTCCATT<br>AAGGTAATTACTTAAAT<br>AGGTAATTACTTAAATG<br>TAATTACTTAAATGTTT<br>TACTTAAATGTTTAACT<br>ACTTAAATGTTTAACTA                                                                                          | AAATAAATTA CTTC AAAC<br>CAAATAAATTA CTTC AAA<br>CTACAAATAAATTA CTTC<br>ACTACAAATAAATTA CTTC<br>ACTTAATTCATTTAGAC<br>GACTTAATTCATTTAGA<br>ATGGACTTAATTCATTT<br>AATGGACTTAATTCATT<br>ATTTAAGTAATTACCTT<br>CATTTAAGTAATTACCT<br>AAACATTTAAGTAATTA<br>AGTTAAACATTTAAGTA<br>TAGTTAAACATTTAAGT                                                                                    |
| Cldn10a    | chr14:119185724-119185740<br>chr14:119185725-119185741<br>chr14:119186811-119186827<br>chr14:119186812-119186828<br>chr14:119187065-119187081<br>chr14:119187066-119187082<br>chr14:119187072-119187088<br>chr14:119187073-119187089<br>chr14:119185724-119185740<br>chr14:119185725-119185741<br>chr14:119186811-119186827<br>chr14:119186812-119186828<br>chr14:119187065-119187081<br>chr14:119187066-119187082<br>chr14:119187072-119187088<br>chr14:119187073-119187089<br>chr14:119185724-119185740 | AAGTATATTTATAAAAAT<br>AGTATATTTATAAAAAT<br>CCTTTACTGAAATAACA<br>CTTTACTGAAATAACAT<br>CAGGAAATTAAGCATTAA<br>AGGAAATTAAGCATTAA<br>TTAAGCATTAACTATGC<br>TAAGCATTAACTATGCT<br>AAGTATATTTATAAAAAT<br>AGTATATTTATAAAAAT<br>CCTTTACTGAAATAACA<br>CTTTACTGAAATAACAT<br>CAGGAAATTAAGCATTAA<br>AGGAAATTAAGCATTAA<br>TTAAGCATTAACTATGC<br>TAAGCATTAACTATGCT<br>AAGTATATTTATAAAAAT | ATTTTATAAATATACTT<br>AATTTTATAAATATACT<br>TGTTATTTTCAGTAAAGG<br>ATGTTATTTTCAGTAAAG<br>TAATGCTTAATTTCCCTG<br>TTAATGCTTAATTTCCCT<br>GCATAGTTAATGCTTAA<br>AGCATAGTTAATGCTTAA<br>ATTTTATAAATATACTT<br>AATTTTATAAATATACT<br>TGTTATTTTCAGTAAAGG<br>ATGTTATTTTCAGTAAAG<br>TAATGCTTAATTTCCCTG<br>TTAATGCTTAATTTCCCT<br>GCATAGTTAATGCTTAA<br>AGCATAGTTAATGCTTAA<br>ATTTTATAAATATACTT |

|         |                                                                                                                                                                                                                                                                                                                                                                                                                                                 |                                                                                                                                                                                                                                                                                                                                |                                                                                                                                                                                                                                                                                                                                      |
|---------|-------------------------------------------------------------------------------------------------------------------------------------------------------------------------------------------------------------------------------------------------------------------------------------------------------------------------------------------------------------------------------------------------------------------------------------------------|--------------------------------------------------------------------------------------------------------------------------------------------------------------------------------------------------------------------------------------------------------------------------------------------------------------------------------|--------------------------------------------------------------------------------------------------------------------------------------------------------------------------------------------------------------------------------------------------------------------------------------------------------------------------------------|
|         | chr14:119185725-119185741<br>chr14:119186811-119186827<br>chr14:119186812-119186828<br>chr14:119187065-119187081<br>chr14:119187066-119187082<br>chr14:119187072-119187088<br>chr14:119187073-119187089<br>chr14:119185724-119185740<br>chr14:119185725-119185741<br>chr14:119186811-119186827<br>chr14:119186812-119186828<br>chr14:119187065-119187081<br>chr14:119187066-119187082<br>chr14:119187072-119187088<br>chr14:119187073-119187089 | AGTATATTTATAAAAATT<br>CCTTTACTGAAATAACA<br>CTTTACTGAAATAACAT<br>CAGGAAATTAAGCATTAA<br>AGGAAATTAAGCATTAA<br>TTAAGCATTAACTATGCT<br>TAAGCATTAACTATGCT<br>AAGTATATTTATAAAAAT<br>AGTATATTTATAAAAATT<br>CCTTTACTGAAATAACA<br>CTTTACTGAAATAACAT<br>CAGGAAATTAAGCATTAA<br>AGGAAATTAAGCATTAA<br>TTAAGCATTAACTATGCT<br>TAAGCATTAACTATGCT | AATTTTATAAAATATACT<br>TGTTATTTTCAGTAAAGG<br>ATGTTATTTTCAGTAAAG<br>TAATGCTTAATTTCCCTG<br>TTAATGCTTAATTTCCCT<br>GCATAGTTAATGCTTAA<br>AGCATAGTTAATGCTTAA<br>ATTTTATAAAATATACTT<br>AATTTTATAAAATATACT<br>TGTTATTTTCAGTAAAGG<br>ATGTTATTTTCAGTAAAG<br>TAATGCTTAATTTCCCTG<br>TTAATGCTTAATTTCCCT<br>GCATAGTTAATGCTTAA<br>AGCATAGTTAATGCTTAA |
| Defb19  | chr2:152406259-152406275<br>chr2:152406258-152406274<br>chr2:152406255-152406271<br>chr2:152406254-152406270                                                                                                                                                                                                                                                                                                                                    | TGTTAATTACCTTAGGA<br>ATGTTAATTACCTTAGG<br>CCCATGTTAATTACCTT<br>ACCCATGTTAATTACCT                                                                                                                                                                                                                                               | TCCTAAGGTAATTAACA<br>CCTAAGGTAATTAACAT<br>AAGGTAATTAACATGGG<br>AGGTAATTAACATGGGT                                                                                                                                                                                                                                                     |
| Prodh2  | chr7:31278540-31278556<br>chr7:31278541-31278557<br>chr7:31278543-31278559<br>chr7:31278544-31278560<br>chr7:31278545-31278561<br>chr7:31278547-31278563<br>chr7:31278599-31278615<br>chr7:31278602-31278618                                                                                                                                                                                                                                    | CTAACCATTAATTATTA<br>TAACCATTAATTATTA<br>ACCATTAATTATTAACC<br>CCATTAATTATTAACCC<br>CATTAATTATTAACCCT<br>TTAATTATTAACCCTCC<br>GCCCAGTTAATCAGTAA<br>CAGTTAATCAGTAACTG                                                                                                                                                            | TAATAATTAATGGTTAG<br>TTAATAATTAATGGTTA<br>GGTTAATAATTAATGGT<br>GGGTTAATAATTAATGG<br>AGGGTTAATAATTAATG<br>GGAGGGTTAATAATTA<br>TTACTGATTAACTGGGC<br>CAGTTACTGATTAACTG                                                                                                                                                                  |
| Slc6a13 | chr6:121249921-121249937<br>chr6:121249922-121249938<br>chr6:121249925-121249941<br>chr6:121249926-121249942<br>chr6:121250680-121250696<br>chr6:121250681-121250697<br>chr6:121250684-121250700                                                                                                                                                                                                                                                | ATACTTTTAAATTAATC<br>TACTTTTAAATTAATCC<br>TTTTAAATTAATCCTAA<br>TTTTAAATTAATCCTAAT<br>TGCGTTACTCATTAAACC<br>GCGTTACTCATTAAACC<br>TTACTCATTAAACCCTCAG                                                                                                                                                                            | GATTAATTTAAAAGTAT<br>GGATTAATTTAAAAGTA<br>TTAGGATTAATTTAAAA<br>ATTAGGATTAATTTAAA<br>GGTTAATGAGTAAACGCA<br>AGGTTAATGAGTAAACGC<br>CTGAGGTTAATGAGTAA                                                                                                                                                                                    |
| Slc7a9  | chr7:36234025-36234041<br>chr7:36234027-36234043<br>chr7:36234028-36234044<br>chr7:36234496-36234512                                                                                                                                                                                                                                                                                                                                            | GGGTGTTTAAATAATTAC<br>GTGTTTAAATAATTACCT<br>TGTTTAAATAATTACCTC<br>TATGTAATAATGCCTTT                                                                                                                                                                                                                                            | GTAATTATTAACACCC<br>AGGTAATTATTAACAC<br>GAGGTAATTATTAACA<br>AAAGGCATTATTACATA                                                                                                                                                                                                                                                        |
| Sucnr1  | chr3:59885389-59885405<br>chr3:59885565-59885581<br>chr3:59885566-59885582<br>chr3:59885692-59885708<br>chr3:59885693-59885709<br>chr3:59885713-59885729<br>chr3:59885714-59885730<br>chr3:59885715-59885731<br>chr3:59885718-59885734<br>chr3:59886130-59886146<br>chr3:59886131-59886147                                                                                                                                                      | GTTTAATTATTGTATGC<br>GAGTGATCAACTAAAT<br>AGTGTATCAACTAAATT<br>TTCTGAATAAATTATCC<br>TCTGAATAAATTATCCC<br>CTTTTGAATTATTAATC<br>TTTTGAATTATTAATCT<br>TTTGAATTATTAATCTT<br>GAATTATTAATCTTGGC<br>AGTGAAATTATTTAGAG<br>GTGAAATTATTTAGAGA                                                                                             | GCATACAATAATTA AAC<br>ATTTAGTTGATACACTC<br>AATTTAGTTGATACACT<br>GGATAATTTATTCAGAA<br>GGGATAATTTATTCAGA<br>GATTAATAATTCAAAAAG<br>AGATTAATAATTCAAAA<br>AAGATTAATAATTCAAAA<br>GCCAAGATTAATAATTC<br>CTCTAAATAATTTCACT<br>TCTCTAAATAATTTCAAC                                                                                              |

|                    |                                                                                                                                                                                                                              |                                                                                                                                              |                                                                                                                                              |
|--------------------|------------------------------------------------------------------------------------------------------------------------------------------------------------------------------------------------------------------------------|----------------------------------------------------------------------------------------------------------------------------------------------|----------------------------------------------------------------------------------------------------------------------------------------------|
|                    | chr3:59886267-59886283                                                                                                                                                                                                       | GATTTAAGAATAAGATT                                                                                                                            | AATCTTATTCTTAAATC                                                                                                                            |
| Sult1d1            | chr5:87998471-87998487<br>chr5:87998218-87998234                                                                                                                                                                             | AAGCAATTTATTAATAAAT<br>CAACACATTATTCTCTT                                                                                                     | ATTTTAATAAAATTGCTT<br>AAGAGAATAATGTGTTG                                                                                                      |
| Ttc36              | chr9:44611477-44611493<br>chr9:44611476-44611492<br>chr9:44611457-44611473<br>chr9:44611456-44611472                                                                                                                         | ACTTAAATAAAAAAAAAAG<br>CACTTAAATAAAAAAAAA<br>TGTTTATTAATTAATAACT<br>ATGTTTATTAATTAATAAC                                                      | CTTTTTTTTATTTAAGT<br>TTTTTTTTTATTTAAGTG<br>AGTTTAATTAATAAACA<br>GTTTAATTAATAAACAT                                                            |
| <b>TF: Irx1</b>    |                                                                                                                                                                                                                              |                                                                                                                                              |                                                                                                                                              |
| <b>Target</b>      | <b>Genomic location</b>                                                                                                                                                                                                      | <b>Site</b>                                                                                                                                  | <b>Reverse complement</b>                                                                                                                    |
| Anxa13             | chr15:58220888-58220904<br>chr15:58220887-58220903<br>chr15:58220764-58220780<br>chr15:58220763-58220779<br>chr15:58220544-58220560<br>chr15:58220543-58220559                                                               | GTTTAATAAGTAACTTT<br>CGTTTAATAAGTAACTT<br>TACTTACATGACGATTC<br>ATACTTACATGACGATT<br>ATTCTACAAATAAATGC<br>CATTCTACAAATAAATG                   | AAAGTTACTTATTA AAC<br>AAGTTACTTATTAACG<br>GAATCGTCATGTAAGTA<br>AATCGTCATGTAAGTAT<br>GCATTTATTTGTAGAAT<br>CATTATTTGTAGAATG                    |
| Fabp4              | chr3:10208691-10208707<br>chr3:10208690-10208706                                                                                                                                                                             | CTGAGTCATGTTTTTAA<br>TCTGAGTCATGTTTTTA                                                                                                       | TTAAAAACATGACTCAG<br>TAAAAACATGACTCAGA                                                                                                       |
| Lgr4               | chr2:109756870-109756886<br>chr2:109757734-109757750<br>chr2:109757735-109757751                                                                                                                                             | TGGGTTTCATAAAAATG<br>AGTTTTGCATGTACCTA<br>GTTTTGCATGTACCTAA                                                                                  | CATTTTTAATGAACCCA<br>TAGGTACATGCAAAACT<br>TTAGGTACATGCAAAAC                                                                                  |
| Ttc36              | chr9:44611543-44611559<br>chr9:44611503-44611519<br>chr9:44611502-44611518<br>chr9:44611449-44611465<br>chr9:44611448-44611464                                                                                               | TATGTACACTTTTTACT<br>AATAAACATGTTTAAAA<br>AAATAAACATGTTTAAAA<br>ACTTGACATGTTTATTA<br>AACTTGACATGTTTATT                                       | AGTAAAAAGTGTACATA<br>TTTTAAACATGTTTATT<br>TTTAAACATGTTTATTT<br>TAATAAACATGTCAAGT<br>AATAAACATGTCAAGTT                                        |
| <b>TF: Tcfap2b</b> |                                                                                                                                                                                                                              |                                                                                                                                              |                                                                                                                                              |
| <b>Target</b>      | <b>Genomic location</b>                                                                                                                                                                                                      | <b>Site</b>                                                                                                                                  | <b>Reverse complement</b>                                                                                                                    |
| Cdh1               | chr8:109127193-109127206<br>chr8:109127225-109127238                                                                                                                                                                         | GCGTCCCCAGCCAA<br>GTGCCTGCGGGCTC                                                                                                             | TTGGCTGGGGACGC<br>GAGCCCGCAGGCAC                                                                                                             |
| Esrp1              | chr4:11313768-11313781                                                                                                                                                                                                       | CACACCCTGGGCAG                                                                                                                               | CTGCCCGGGGTGTG                                                                                                                               |
| Lad1               | chr1:137715255-137715268<br>chr1:137715256-137715269                                                                                                                                                                         | CTGCCCGGGGCAG<br>TCGCCCGGGGCAGC                                                                                                              | CTGCCCGGGGCAG<br>GCTGCCCGGGCGA                                                                                                               |
| Mal                | chr2:127483876-127483889<br>chr2:127483469-127483482<br>chr2:127483099-127483112<br>chr2:127482167-127482180<br>chr2:127482066-127482079<br>chr2:127482044-127482057<br>chr2:127481962-127481975<br>chr2:127481953-127481966 | CTACACTGGGCCAC<br>ATGACTTAAGGGGA<br>GCTCCCCAGGTCAA<br>CTGCCTGAGGGCAG<br>ATCGCCTCTGGCGC<br>CTGCCCTAGAGGAC<br>GCGCCCTCCCGCGC<br>GTGGCCGCGGCACC | GTGGCCCAGTGTAG<br>TCCCCTTAAGTCAT<br>TTGACCTGGGGAGC<br>CTGCCCTCAGGCAG<br>GCGCCAGAGGCGAT<br>GTCCTCTAGGGCAG<br>GCGCGGGAGGGCGC<br>GGCGCCGCGGCACC |
| Pou3f3             | chr1:42752597-42752610                                                                                                                                                                                                       | GCGGCGGAGGGTAA                                                                                                                               | TTACCCTCCGCCGC                                                                                                                               |
| Ppp1r11            | chr17:37088602-37088615<br>chr17:37088601-37088614                                                                                                                                                                           | CACCCCTGGGGAAA<br>CCACCCCTGGGGAA                                                                                                             | TTTCCCAGGGGTG<br>TTCCCAGGGGTGG                                                                                                               |
| Sim1               | chr10:50615787-50615800<br>chr10:50615868-50615881                                                                                                                                                                           | TTACCCTCAGCCAT<br>TTCCAGAAGGTAA                                                                                                              | ATGGCTGAGGGTAA<br>TTACCTTCTGGAAA                                                                                                             |
| Wfdc2              | chr2:164387851-164387864<br>chr2:164387954-164387967                                                                                                                                                                         | ATCACTGCAGCCTT<br>TTGCCCTCAGGCCT                                                                                                             | AAGGCTGCAGTGAT<br>AGGCTGAGGGCAA                                                                                                              |

|                 |                                                                                                                                                                                                                                                                                                                                                                                                                                                              |                                                                                                                                                                                                                                                                                                                                              |                                                                                                                                                                                                                                                                                                                                               |
|-----------------|--------------------------------------------------------------------------------------------------------------------------------------------------------------------------------------------------------------------------------------------------------------------------------------------------------------------------------------------------------------------------------------------------------------------------------------------------------------|----------------------------------------------------------------------------------------------------------------------------------------------------------------------------------------------------------------------------------------------------------------------------------------------------------------------------------------------|-----------------------------------------------------------------------------------------------------------------------------------------------------------------------------------------------------------------------------------------------------------------------------------------------------------------------------------------------|
|                 | chr2:164387955-164387968<br>chr2:164388410-164388423<br>chr2:164388677-164388690<br>chr2:164388700-164388713                                                                                                                                                                                                                                                                                                                                                 | TGCCCTCAGGCCTT<br>TATCCTTGAAGCTT<br>GGCCCCTGGGCCAA<br>AATCCTTGGGGTTG                                                                                                                                                                                                                                                                         | AAGGCCTGAGGGCA<br>AAGCTTCAAGGATA<br>TTGGCCCAGGGGCC<br>CAACCCCAAGGATT                                                                                                                                                                                                                                                                          |
| <b>TF: Sox8</b> |                                                                                                                                                                                                                                                                                                                                                                                                                                                              |                                                                                                                                                                                                                                                                                                                                              |                                                                                                                                                                                                                                                                                                                                               |
| <b>Target</b>   | <b>Genomic location</b>                                                                                                                                                                                                                                                                                                                                                                                                                                      | <b>Site</b>                                                                                                                                                                                                                                                                                                                                  | <b>Reverse complement</b>                                                                                                                                                                                                                                                                                                                     |
| Chrd11          | chrX:139830272-139830288<br>chrX:139830148-139830164<br>chrX:139830044-139830060<br>chrX:139830037-139830053<br>chrX:139829987-139830003<br>chrX:139829951-139829967<br>chrX:139829948-139829964<br>chrX:139829945-139829961<br>chrX:139829929-139829945<br>chrX:139829901-139829917<br>chrX:139829852-139829868<br>chrX:139829600-139829616<br>chrX:139829526-139829542<br>chrX:139829510-139829526<br>chrX:139829241-139829257<br>chrX:139829234-139829250 | GCTTGTTCAATTCCCTT<br>ATTCAATTTGTGCTGTA<br>TTGTTAACAAGAGAGAG<br>TATTCATTGTTAACAA<br>TACTTAAGTATTAGTAT<br>ACAATAATTGTCCTTTG<br>GAAACAATAATTGTCCT<br>ACTGAAACAATAATTGT<br>CAAGGCACAAATGAAAA<br>CAGCAAACAAAAACCTA<br>AATGCAATTGATGCTCA<br>ACCATATCAATATTAGT<br>AAATGGATAAATACTCAT<br>GGGTGTTTTGTACATGA<br>CTGCTAAATATTTTGAG<br>CTACTAACTGCTAAATA | AAGGGAATTGAACAAGC<br>TACAGCACAAATTGAAT<br>CTCTCTCTTGTTAACAA<br>TTGTTAACAATGAAATA<br>ATACTAATACTTAAGTA<br>CAAAGGACAATTATTGT<br>AGGACAATTATTGTTTC<br>ACAATTATTGTTTCAGT<br>TTTTCATTTGTGCCTTG<br>TAGGTTTTTGTGTTGCTG<br>TGAGCATCAATTGCATT<br>ACTAATATTGATATGGT<br>ATGAGTATTATCCATTT<br>TCATGTACAAAAACCCC<br>CTCAAAATATTTAGCAG<br>TATTTAGCAGTTAGTAG |
| Fstl5           | chr3:75877719-75877735<br>chr3:75877722-75877738<br>chr3:75877949-75877965<br>chr3:75878395-75878411<br>chr3:75878735-75878751<br>chr3:75878899-75878915<br>chr3:75878904-75878920<br>chr3:75878963-75878979<br>chr3:75878982-75878998                                                                                                                                                                                                                       | TCGGACATAATAAAAAAC<br>GACATAATAAAAACTGT<br>TTTTAATTCCTTTCCA<br>TGCAAAACAGTTACGTC<br>GATTCTGTAGTTCTAAC<br>AAGAATAGAATATTGTT<br>TAGAATATTGTTATAAAA<br>TAAAAATAAGTTATTT<br>ATTTCTATAATTTGAGA                                                                                                                                                    | GTTTTTATTATGTCGGA<br>ACAGTTTTTATTATGTC<br>TGGAAAAGAATTAATAAAA<br>GACGTAAGTGTGTTGCA<br>GTTAGAACTACAGAATC<br>AACAAATTCTATTCTT<br>TTTATAACAATATTCTA<br>AAATAACTTATTTTTAA<br>TCTCAAATTATAGAAAT                                                                                                                                                    |
| Lhx8            | chr3:153994347-153994363<br>chr3:153994249-153994265<br>chr3:153994235-153994251<br>chr3:153993813-153993829<br>chr3:153993107-153993123<br>chr3:153993104-153993120<br>chr3:153993098-153993114                                                                                                                                                                                                                                                             | AACAAAACCATGCTTTT<br>ATTACTTTTATTTATTT<br>GAAGTTATTTTTTAATT<br>ACCTAAACAAAGATTTCG<br>AAAAAAATTGTCAGGTC<br>ATAAAAAAATTGTCAG<br>TACGTAATAAAAAAAT                                                                                                                                                                                               | AAAAGCATGGTTTTGTT<br>AAATAAATAAAAGTAAT<br>AATTAATAAAATAACTTC<br>CGAATCTTTGTTTAGGT<br>GACCTGACAATTTTTTT<br>CTGACAATTTTTTTTAT<br>ATTTTTTTTATTACGTA                                                                                                                                                                                              |
| Lix1            | chr17:17538284-17538300<br>chr17:17538293-17538309<br>chr17:17538296-17538312<br>chr17:17538386-17538402<br>chr17:17538392-17538408<br>chr17:17538632-17538648<br>chr17:17539196-17539212<br>chr17:17539199-17539215<br>chr17:17539218-17539234<br>chr17:17539515-17539531                                                                                                                                                                                   | ATCATTATAATAGCATT<br>ATAGCATTTATTATCAC<br>GCATTTATTATCACTGC<br>CATTCTATTTATATAGT<br>ATTTATATAGTCTTTAA<br>CAAAGTGTTATTTTACA<br>TCAGGATTAATTAAGT<br>GGATTAATTAAGTCAA<br>TTGGGAACGATTTGTCT<br>GGCAGCACATTTAAAGA                                                                                                                                 | AATGCTATTATAATGAT<br>GTGATAATAAATGCTAT<br>GCAGTGATAATAAATGC<br>ACTATATAAATAGAAATG<br>TTAAAGACTATATAAAT<br>TGTAATAAACACTTTG<br>ACTTTAATTAATCCTGA<br>TTGACTTTAATTAATCC<br>AGACAAATCGTTCCCAA<br>TCTTTAATGTGCTGCC                                                                                                                                 |

|                  |                                                                                                                                                                                                                                                                                                                                                                                                      |                                                                                                                                                                                                                                                                                                                         |                                                                                                                                                                                                                                                                                                                                                                    |
|------------------|------------------------------------------------------------------------------------------------------------------------------------------------------------------------------------------------------------------------------------------------------------------------------------------------------------------------------------------------------------------------------------------------------|-------------------------------------------------------------------------------------------------------------------------------------------------------------------------------------------------------------------------------------------------------------------------------------------------------------------------|--------------------------------------------------------------------------------------------------------------------------------------------------------------------------------------------------------------------------------------------------------------------------------------------------------------------------------------------------------------------|
|                  | chr17:17539715-17539731<br>chr17:17540133-17540149                                                                                                                                                                                                                                                                                                                                                   | CATACAACAAAGATAAG<br>ATTTAAATTGTTCCCGA                                                                                                                                                                                                                                                                                  | CTTATCTTTGTTGTATG<br>TCGGGAACAATTTAAAT                                                                                                                                                                                                                                                                                                                             |
| Slitrk4          | chrX:61531633-61531649<br>chrX:61531629-61531645<br>chrX:61531270-61531286<br>chrX:61531207-61531223<br>chrX:61531206-61531222<br>chrX:61531205-61531221<br>chrX:61531204-61531220<br>chrX:61531202-61531218<br>chrX:61531200-61531216<br>chrX:61530840-61530856<br>chrX:61530775-61530791<br>chrX:61530745-61530761<br>chrX:61529851-61529867<br>chrX:61529844-61529860<br>chrX:61529841-61529857   | AGATTGATAATTTAGTT<br>ACACAGATTGATAATTT<br>AGAGGCATTGTGTGCAT<br>AAAAAAAAAAAAACCCC<br>AAAAAAAAAAAAAACCC<br>GAAAAAAAAAAAAAACCC<br>GGAAAAAAAAAAAAAAC<br>AGGGAAAAAAAAAAAAA<br>ATAGGGAAAAAAAAAAAA<br>TGGCTAACTGTCATCCC<br>TTAACAACAATGACATT<br>ACTTGAATAATTCCAGA<br>CTAAAAATAATAAGCTA<br>CCAACAATAAAAAATA<br>ACTCCAACAATAAAAA | AACTAAATTATCAATCT<br>AAATTATCAATCTGTGT<br>ATGCACACAATGCCTCT<br>GGGGTTTTTTTTTTTTT<br>GGGTTTTTTTTTTTTTT<br>GGTTTTTTTTTTTTTTT<br>GGTTTTTTTTTTTTTTT<br>GTTTTTTTTTTTTTTTC<br>GTTTTTTTTTTTTTTCC<br>TTTTTTTTTTTTTTCCCT<br>TTTTTTTTTTTTTTCCCT<br>GGGATGACAGTTAGCCA<br>AATGTCATTGTTGTTAA<br>TCTGGAATTATTCAAGT<br>TAGCTTATTATTTTAG<br>TTATTTTTAGTTGTTGG<br>TTTTTAGTTGTTGGAGT |
| Tmem56           | chr3:120967584-120967600<br>chr3:120967525-120967541<br>chr3:120967496-120967512<br>chr3:120967104-120967120<br>chr3:120967099-120967115<br>chr3:120967096-120967112<br>chr3:120966978-120966994<br>chr3:120966870-120966886<br>chr3:120966786-120966802<br>chr3:120966779-120966795<br>chr3:120966698-120966714<br>chr3:120966693-120966709<br>chr3:120966688-120966704<br>chr3:120966678-120966694 | AAATACACTATGGAAAT<br>ACATCTATAATTCTCTA<br>CTCCTGATAATGCACCA<br>AATTCAATTATTTCTGA<br>GGAACAATTCAATTATT<br>AATGGAACAATTCAATT<br>TGGAAAGCAATAGAACC<br>TACATATTTGACCTAAT<br>TTCTACATAAATCGAAT<br>AGATGAATTCTACATAA<br>AACTAAATAATGCAGAG<br>AATAAAACTAAATAATG<br>ACTGGAATAAAACTAAA<br>GATCCAATTAACTGGAA                      | ATTTCCATAGTGTATTT<br>TAGAGAATTATAGATGT<br>TGGTGCATTATCAGGAG<br>TCAGAAATAATTGAATT<br>AATAATTGAATTGTTCC<br>AATTGAATTGTTCCATT<br>GGTTCATTGCTTTCCA<br>ATTAGGTCAAATATGTA<br>ATTCGATTTATGTAGAA<br>TTATGTAGAATTCATCT<br>CTCTGCATTATTTAGTT<br>CATTATTTAGTTTTATT<br>TTTAGTTTTATTCCAGT<br>TTCCAGTTAATTGGATC                                                                  |
| <b>TF: Foxi1</b> |                                                                                                                                                                                                                                                                                                                                                                                                      |                                                                                                                                                                                                                                                                                                                         |                                                                                                                                                                                                                                                                                                                                                                    |
| <b>Target</b>    | <b>Genomic location</b>                                                                                                                                                                                                                                                                                                                                                                              | <b>Site</b>                                                                                                                                                                                                                                                                                                             | <b>Reverse complement</b>                                                                                                                                                                                                                                                                                                                                          |
| 1110017F19Rik    | chr11:115772421-115772433<br>chr11:115773566-115773578                                                                                                                                                                                                                                                                                                                                               | AGGTATTAATAGA<br>CCTTGTTTGCTCT                                                                                                                                                                                                                                                                                          | TCTATTAATACCT<br>AGAGCAAACAAGG                                                                                                                                                                                                                                                                                                                                     |
| Cldn8            | chr16:88563100-88563112                                                                                                                                                                                                                                                                                                                                                                              | TGATGTTGGCATG                                                                                                                                                                                                                                                                                                           | CATGCCAACATCA                                                                                                                                                                                                                                                                                                                                                      |
| Dsc2             | chr18:20219421-20219433                                                                                                                                                                                                                                                                                                                                                                              | TTATATTTGTTTC                                                                                                                                                                                                                                                                                                           | GAAACAAATATAA                                                                                                                                                                                                                                                                                                                                                      |
| Ehf              | chr2:103143480-103143492<br>chr2:103143461-103143473                                                                                                                                                                                                                                                                                                                                                 | ATTACAAACATTG<br>TAAAAAATAAAAA                                                                                                                                                                                                                                                                                          | CAATGTTTGTAAT<br>TTTTATTTTITTA                                                                                                                                                                                                                                                                                                                                     |
| Endod1           | chr9:14187136-14187148<br>chr9:14185872-14185884<br>chr9:14185868-14185,880                                                                                                                                                                                                                                                                                                                          | ACATGTTTACTTT<br>TAAATAAATACTG<br>TAAATAAATAAAT                                                                                                                                                                                                                                                                         | AAAGTAAACATGT<br>CAGTATTTATTTA<br>ATTTATTTATTTA                                                                                                                                                                                                                                                                                                                    |
| Exph5            | chr9:53108796-53108808<br>chr9:53109168-53109180<br>chr9:53109402-53109414<br>chr9:53109420-53109432<br>chr9:53109482-53109494                                                                                                                                                                                                                                                                       | TGGTATTTGTGGA<br>TTGGCAAATAAATT<br>CCAGCAAATAGCA<br>CAAGCAAATACTT<br>GCTTGTTTGCTTA                                                                                                                                                                                                                                      | TCCACAAATACCA<br>AATTATTTGCCAA<br>TGCTATTTGCTGG<br>AAGTATTTGCTTG<br>TAAGCAAACAAGC                                                                                                                                                                                                                                                                                  |
| Foxq1            | chr13:31648955-31648967                                                                                                                                                                                                                                                                                                                                                                              | AAAATAAACTTCA                                                                                                                                                                                                                                                                                                           | TGAAGTTTATTTT                                                                                                                                                                                                                                                                                                                                                      |

|        |                                                                                                          |                                                                  |                                                                  |
|--------|----------------------------------------------------------------------------------------------------------|------------------------------------------------------------------|------------------------------------------------------------------|
|        | chr13:31650003-31650015                                                                                  | AAAACAAACAACC                                                    | GGTTGTTTGT                                                       |
| Gjb1   | chrX:98571990-98572002<br>chrX:98572486-98572498                                                         | TTCTGTTTACCTA<br>TCTTGTTTAATGA                                   | TAGGTAAACAGAA<br>TCATTAACAAGA                                    |
| Gsdmc  | chr15:63640588-63640600                                                                                  | TTCACAAACAAGT                                                    | ACTTGTTTGTGAA                                                    |
| Muc1   | chr3:89033297-89033309                                                                                   | TAGGCAAATAATA                                                    | TATTATTTGCCTA                                                    |
| Pde8b  | chr13:96021126-96021138<br>chr13:96020763-96020775                                                       | AAATATTTATTAT<br>ACATGTTTCCAGA                                   | ATAATAAATATTT<br>TCTGGAAACATGT                                   |
| Rnf186 | chr4:138522998-138523010                                                                                 | TAAAGAAATAATA                                                    | TATTATTTCTTTA                                                    |
| Slc8a1 | chr17:82138259-82138271<br>chr17:82137904-82137916<br>chr17:82138259-82138271<br>chr17:82137904-82137916 | AGACATTTATTTA<br>AAAATACACATAT<br>AGACATTTATTTA<br>AAAATACACATAT | TAAATAAATGTCT<br>ATATGTGTATTTT<br>TAAATAAATGTCT<br>ATATGTGTATTTT |
| Sox6   | chr7:123182219-123182231<br>chr7:123139645-123139657<br>chr7:123139826-123139838                         | AGCTGTTTGTGTT<br>TTCACAAACAACC<br>GAGTGTTTGCAG                   | AACACAAACAGCT<br>GGTTGTTTGTGAA<br>CTCGAAACACTC                   |
